# Supplementary material for: Haplotype Analysis Improved Evidence for Candidate Genes for Intramuscular Fat Percentage from a Genome Wide Association Study of Cattle
Source: PubMed Central journal article supplement (PMC3247274; doi:10.1371/journal.pone.0029601), 2011-12-28
Supplement: pone.0029601.s001.pdf [file pone.0029601.s001.pdf]

## Haplotype analysis improved evidence for candidate genes for intramuscular fat percentage from a genome wide association study of cattle

W. Barendse

### Supplementary Tables

**Table S1. Uncorrected IMF variability in the different breeds**

| Breed                     | n   | $\bar{x}$ (%) | s.d. | min | max  | CV   |
|---------------------------|-----|---------------|------|-----|------|------|
| Angus                     | 220 | 6.1           | 2.2  | 2.0 | 12.0 | 0.36 |
| Hereford                  | 146 | 4.7           | 1.6  | 2.0 | 10.1 | 0.35 |
| Murray Grey               | 55  | 5.8           | 2.1  | 2.0 | 11.5 | 0.36 |
| Shorthorn                 | 81  | 5.8           | 1.9  | 2.2 | 11.7 | 0.33 |
| Belmont Red               | 165 | 3.9           | 1.6  | 1.5 | 10.6 | 0.40 |
| Santa Gertrudis           | 126 | 3.8           | 1.5  | 1.4 | 10.6 | 0.39 |
| Angus x Brahman           | 11  | 5.0           | 2.0  | 2.7 | 9.2  | 0.40 |
| Hereford x Brahman        | 8   | 4.5           | 1.3  | 3.1 | 6.7  | 0.28 |
| Shorthorn x Brahman       | 6   | 3.2           | 0.2  | 3.0 | 3.6  | 0.06 |
| Belmont Red x Brahman     | 35  | 3.4           | 1.1  | 2.1 | 6.4  | 0.33 |
| Santa Gertrudis x Brahman | 9   | 3.1           | 0.9  | 2.0 | 4.7  | 0.30 |
| Brahman                   | 78  | 3.2           | 1.8  | 1.4 | 12.6 | 0.57 |
| Total                     | 940 | 4.7           | 2.1  | 1.4 | 12.6 | 0.44 |
