# Supplementary material for: Haplotype Analysis Improved Evidence for Candidate Genes for Intramuscular Fat Percentage from a Genome Wide Association Study of Cattle
Source: PubMed Central journal article supplement (PMC3247274; doi:10.1371/journal.pone.0029601), 2011-12-28
Supplement: pone.0029601.s002.pdf [file pone.0029601.s002.pdf]

## Haplotype analysis improved evidence for candidate genes for intramuscular fat percentage from a genome wide association study of cattle

W. Barendse

### Supplementary Tables

**Table S2. Uncorrected LLPF variability in the different breeds**

| Breed                     | n   | $\bar{x}$ (%) | s.d. | min | max | CV   |
|---------------------------|-----|---------------|------|-----|-----|------|
| Angus                     | 220 | 3.9           | 0.6  | 2.7 | 6.2 | 0.14 |
| Hereford                  | 144 | 4.0           | 0.8  | 2.5 | 8.2 | 0.19 |
| Murray Grey               | 55  | 3.8           | 0.5  | 2.4 | 5.2 | 0.14 |
| Shorthorn                 | 81  | 4.3           | 0.9  | 2.8 | 7.2 | 0.20 |
| Belmont Red               | 165 | 4.4           | 0.9  | 3.2 | 9.7 | 0.21 |
| Santa Gertrudis           | 125 | 4.4           | 0.9  | 2.4 | 7.7 | 0.21 |
| Angus x Brahman           | 11  | 4.2           | 0.6  | 3.3 | 5.1 | 0.14 |
| Hereford x Brahman        | 8   | 4.2           | 0.3  | 3.8 | 4.6 | 0.07 |
| Shorthorn x Brahman       | 6   | 4.7           | 0.9  | 4.2 | 5.3 | 0.09 |
| Belmont Red x Brahman     | 35  | 4.6           | 0.6  | 3.7 | 6.6 | 0.14 |
| Santa Gertrudis x Brahman | 9   | 4.2           | 0.5  | 3.3 | 5.0 | 0.12 |
| Brahman                   | 77  | 5.1           | 1.1  | 3.0 | 9.7 | 0.21 |
| Total                     | 936 | 4.2           | 0.9  | 2.4 | 9.7 | 0.21 |
