# Supplementary material for: Haplotype Analysis Improved Evidence for Candidate Genes for Intramuscular Fat Percentage from a Genome Wide Association Study of Cattle
Source: PubMed Central journal article supplement (PMC3247274; doi:10.1371/journal.pone.0029601), 2011-12-28
Supplement: pone.0029601.s004.pdf [file pone.0029601.s004.pdf]

**Haplotype analysis improved evidence for candidate genes for intramuscular fat percentage from a genome wide association study of cattle**

W. Barendse

**Supplementary Tables**

**Table S4. Haplotype counts for each gene in each pure breed**

| Gene          | Breed | Haplotypes |     |     |     |     |     |     |     |
|---------------|-------|------------|-----|-----|-----|-----|-----|-----|-----|
|               |       | 111        | 112 | 121 | 122 | 211 | 212 | 221 | 222 |
| <i>ADIPOQ</i> | ANG   | 0          | 0   | 0   | 356 | 0   | 1   | 0   | 83  |
|               | HFD   | 0          | 0   | 28  | 245 | 10  | 2   | 0   | 7   |
|               | MGY   | 0          | 0   | 0   | 103 | 0   | 0   | 0   | 7   |
|               | SHN   | 0          | 0   | 0   | 153 | 0   | 0   | 0   | 9   |
|               | BEL   | 0          | 0   | 1   | 169 | 0   | 5   | 0   | 155 |
|               | SGT   | 0          | 0   | 0   | 184 | 0   | 0   | 0   | 68  |
|               | BRM   | 0          | 0   | 0   | 39  | 0   | 0   | 0   | 117 |
| <i>CAPN1</i>  | ANG   | 0          | 175 | 62  | 129 | 0   | 0   | 36  | 38  |
|               | HFD   | 9          | 52  | 25  | 135 | 0   | 0   | 13  | 58  |
|               | MGY   | 0          | 48  | 0   | 22  | 0   | 0   | 26  | 14  |
|               | SHN   | 0          | 0   | 38  | 3   | 0   | 0   | 121 | 0   |
|               | BEL   | 5          | 139 | 109 | 29  | 0   | 0   | 20  | 28  |
|               | SGT   | 39         | 27  | 101 | 61  | 0   | 0   | 17  | 7   |
|               | BRM   | 2          | 2   | 127 | 16  | 0   | 1   | 5   | 3   |
| <i>CAPN3</i>  | ANG   | 2          | 0   | 152 | 0   | 236 | 0   | 6   | 44  |
|               | HFD   | 0          | 0   | 90  | 0   | 68  | 0   | 134 | 0   |
|               | MGY   | 0          | 0   | 19  | 0   | 43  | 0   | 27  | 21  |
|               | SHN   | 0          | 0   | 60  | 0   | 59  | 0   | 35  | 8   |
|               | BEL   | 11         | 0   | 54  | 14  | 101 | 0   | 141 | 9   |
|               | SGT   | 5          | 0   | 41  | 51  | 61  | 0   | 81  | 13  |
|               | BRM   | 0          | 0   | 2   | 47  | 3   | 0   | 73  | 31  |
| <i>CAST</i>   | ANG   | 0          | 0   | 58  | 85  | 297 | 0   | 0   | 0   |
|               | HFD   | 0          | 0   | 55  | 12  | 225 | 0   | 0   | 0   |
|               | MGY   | 0          | 0   | 15  | 48  | 47  | 0   | 0   | 0   |
|               | SHN   | 0          | 0   | 111 | 0   | 50  | 1   | 0   | 0   |
|               | BEL   | 0          | 0   | 9   | 60  | 203 | 16  | 4   | 38  |
|               | SGT   | 0          | 1   | 8   | 52  | 121 | 29  | 22  | 19  |
|               | BRM   | 1          | 0   | 1   | 1   | 43  | 33  | 9   | 68  |
| <i>CEBPA</i>  | ANG   | 0          | 0   | 12  | 0   | 122 | 286 | 0   | 20  |
|               | HFD   | 0          | 0   | 19  | 0   | 3   | 184 | 25  | 61  |
|               | MGY   | 0          | 0   | 7   | 0   | 2   | 93  | 0   | 8   |
|               | SHN   | 0          | 0   | 0   | 0   | 6   | 124 | 1   | 31  |
|               | BEL   | 0          | 0   | 11  | 29  | 3   | 103 | 1   | 183 |
|               | SGT   | 0          | 0   | 0   | 0   | 1   | 180 | 0   | 71  |
|               | BRM   | 0          | 0   | 0   | 18  | 0   | 12  | 5   | 121 |
| <i>CPE</i>    | ANG   | 98         | 149 | 4   | 129 | 12  | 48  | 0   | 0   |
|               | HFD   | 0          | 176 | 49  | 65  | 1   | 1   | 0   | 0   |

|              |     |    |     |     |     |     |     |     |     |
|--------------|-----|----|-----|-----|-----|-----|-----|-----|-----|
|              | MGY | 55 | 14  | 1   | 11  | 0   | 20  | 0   | 9   |
|              | SHN | 8  | 48  | 1   | 49  | 0   | 6   | 0   | 50  |
|              | BEL | 1  | 135 | 13  | 106 | 2   | 51  | 5   | 17  |
|              | SGT | 2  | 71  | 2   | 68  | 2   | 83  | 0   | 24  |
|              | BRM | 2  | 4   | 4   | 21  | 5   | 80  | 2   | 38  |
| <i>CRH</i>   | ANG | 0  | 0   | 1   | 62  | 0   | 86  | 118 | 173 |
|              | HFD | 0  | 0   | 0   | 82  | 0   | 141 | 4   | 65  |
|              | MGY | 0  | 0   | 0   | 5   | 0   | 49  | 32  | 24  |
|              | SHN | 0  | 0   | 0   | 90  | 0   | 14  | 14  | 44  |
|              | BEL | 0  | 8   | 55  | 135 | 0   | 67  | 12  | 53  |
|              | SGT | 0  | 3   | 23  | 97  | 0   | 88  | 15  | 26  |
|              | BRM | 0  | 4   | 18  | 33  | 0   | 40  | 10  | 51  |
| <i>CXCR4</i> | ANG | 0  | 0   | 0   | 1   | 0   | 25  | 216 | 198 |
|              | HFD | 0  | 0   | 0   | 0   | 0   | 89  | 14  | 189 |
|              | MGY | 0  | 0   | 0   | 0   | 0   | 5   | 56  | 49  |
|              | SHN | 0  | 0   | 0   | 0   | 0   | 1   | 12  | 149 |
|              | BEL | 0  | 0   | 0   | 17  | 0   | 11  | 21  | 281 |
|              | SGT | 0  | 0   | 0   | 3   | 0   | 54  | 11  | 184 |
|              | BRM | 0  | 0   | 0   | 6   | 0   | 8   | 12  | 130 |
| <i>DECRI</i> | ANG | 38 | 68  | 1   | 1   | 5   | 0   | 282 | 45  |
|              | HFD | 28 | 41  | 0   | 0   | 75  | 29  | 18  | 101 |
|              | MGY | 13 | 14  | 0   | 0   | 2   | 0   | 52  | 29  |
|              | SHN | 1  | 50  | 0   | 6   | 23  | 5   | 54  | 23  |
|              | BEL | 48 | 93  | 11  | 0   | 49  | 11  | 96  | 22  |
|              | SGT | 34 | 175 | 0   | 2   | 13  | 1   | 21  | 6   |
|              | BRM | 72 | 69  | 0   | 0   | 1   | 0   | 6   | 8   |
| <i>DGATI</i> | ANG | 0  | 0   | 0   | 0   | 0   | 428 | 0   | 12  |
|              | HFD | 0  | 0   | 0   | 0   | 29  | 263 | 0   | 0   |
|              | MGY | 0  | 0   | 0   | 0   | 0   | 104 | 0   | 6   |
|              | SHN | 0  | 0   | 0   | 0   | 0   | 162 | 0   | 0   |
|              | BEL | 0  | 0   | 0   | 0   | 7   | 199 | 0   | 124 |
|              | SGT | 0  | 0   | 0   | 0   | 1   | 130 | 0   | 121 |
|              | BRM | 0  | 0   | 0   | 1   | 0   | 27  | 0   | 128 |
| <i>FABP4</i> | ANG | 0  | 0   | 0   | 83  | 22  | 74  | 210 | 51  |
|              | HFD | 0  | 0   | 7   | 39  | 71  | 22  | 108 | 45  |
|              | MGY | 0  | 0   | 0   | 39  | 5   | 36  | 15  | 15  |
|              | SHN | 0  | 1   | 44  | 22  | 1   | 72  | 10  | 12  |
|              | BEL | 0  | 9   | 59  | 28  | 35  | 110 | 36  | 53  |
|              | SGT | 0  | 3   | 48  | 27  | 10  | 72  | 12  | 80  |
|              | BRM | 0  | 31  | 2   | 7   | 8   | 80  | 16  | 12  |
| <i>FASN</i>  | ANG | 0  | 117 | 6   | 1   | 27  | 184 | 104 | 1   |
|              | HFD | 0  | 0   | 50  | 0   | 0   | 142 | 48  | 52  |
|              | MGY | 0  | 26  | 1   | 0   | 12  | 30  | 30  | 11  |
|              | SHN | 0  | 1   | 0   | 0   | 8   | 97  | 37  | 19  |
|              | BEL | 0  | 0   | 18  | 0   | 5   | 30  | 207 | 70  |
|              | SGT | 0  | 0   | 2   | 0   | 1   | 26  | 190 | 33  |
|              | BRM | 0  | 0   | 2   | 0   | 0   | 0   | 149 | 5   |
| <i>FGF8</i>  | ANG | 84 | 16  | 224 | 0   | 116 | 0   | 0   | 0   |

|             |     |     |     |    |     |    |     |     |     |
|-------------|-----|-----|-----|----|-----|----|-----|-----|-----|
|             | HFD | 210 | 29  | 32 | 0   | 21 | 0   | 0   | 0   |
|             | MGY | 0   | 0   | 69 | 0   | 41 | 0   | 0   | 0   |
|             | SHN | 115 | 26  | 10 | 0   | 10 | 0   | 1   | 0   |
|             | BEL | 266 | 8   | 11 | 0   | 36 | 1   | 8   | 0   |
|             | SGT | 187 | 27  | 29 | 0   | 9  | 0   | 0   | 0   |
|             | BRM | 142 | 9   | 3  | 0   | 2  | 0   | 0   | 0   |
| <i>GHI</i>  | ANG | 38  | 150 | 54 | 89  | 28 | 2   | 79  | 0   |
|             | HFD | 60  | 67  | 33 | 2   | 3  | 16  | 109 | 2   |
|             | MGY | 6   | 67  | 7  | 14  | 14 | 0   | 2   | 0   |
|             | SHN | 16  | 2   | 45 | 63  | 35 | 0   | 0   | 1   |
|             | BEL | 67  | 13  | 3  | 20  | 19 | 6   | 18  | 184 |
|             | SGT | 7   | 26  | 26 | 86  | 12 | 1   | 9   | 85  |
|             | BRM | 4   | 25  | 2  | 27  | 8  | 2   | 21  | 67  |
| <i>GHR</i>  | ANG | 31  | 63  | 0  | 294 | 0  | 52  | 0   | 0   |
|             | HFD | 104 | 0   | 0  | 140 | 0  | 37  | 0   | 11  |
|             | MGY | 0   | 28  | 0  | 63  | 0  | 19  | 0   | 0   |
|             | SHN | 14  | 12  | 0  | 104 | 0  | 25  | 0   | 7   |
|             | BEL | 12  | 2   | 0  | 301 | 0  | 15  | 0   | 0   |
|             | SGT | 12  | 1   | 0  | 162 | 0  | 77  | 0   | 0   |
|             | BRM | 3   | 0   | 0  | 148 | 0  | 5   | 0   | 0   |
| <i>IGF2</i> | ANG | 0   | 0   | 6  | 268 | 1  | 85  | 0   | 80  |
|             | HFD | 0   | 0   | 47 | 132 | 0  | 11  | 20  | 82  |
|             | MGY | 0   | 0   | 0  | 56  | 0  | 20  | 13  | 21  |
|             | SHN | 0   | 0   | 4  | 100 | 0  | 2   | 0   | 56  |
|             | BEL | 0   | 0   | 4  | 57  | 41 | 14  | 9   | 205 |
|             | SGT | 0   | 0   | 19 | 128 | 1  | 19  | 1   | 84  |
|             | BRM | 0   | 0   | 0  | 13  | 0  | 13  | 1   | 129 |
| <i>LEP</i>  | ANG | 1   | 196 | 23 | 0   | 0  | 59  | 149 | 12  |
|             | HFD | 0   | 114 | 0  | 19  | 0  | 126 | 33  | 0   |
|             | MGY | 0   | 14  | 19 | 1   | 0  | 23  | 53  | 0   |
|             | SHN | 2   | 37  | 1  | 1   | 0  | 116 | 5   | 0   |
|             | BEL | 0   | 170 | 7  | 21  | 0  | 103 | 20  | 9   |
|             | SGT | 1   | 148 | 2  | 26  | 0  | 73  | 2   | 0   |
|             | BRM | 0   | 38  | 9  | 89  | 0  | 14  | 6   | 0   |
| <i>RORC</i> | ANG | 0   | 0   | 0  | 121 | 0  | 95  | 117 | 107 |
|             | HFD | 0   | 0   | 0  | 0   | 47 | 214 | 26  | 5   |
|             | MGY | 0   | 0   | 0  | 46  | 0  | 38  | 6   | 20  |
|             | SHN | 0   | 0   | 0  | 50  | 1  | 104 | 4   | 3   |
|             | BEL | 0   | 0   | 0  | 10  | 19 | 134 | 25  | 142 |
|             | SGT | 0   | 0   | 0  | 58  | 2  | 103 | 21  | 68  |
|             | BRM | 0   | 0   | 0  | 2   | 1  | 7   | 50  | 96  |
| <i>SCD</i>  | ANG | 0   | 1   | 0  | 0   | 0  | 133 | 44  | 262 |
|             | HFD | 0   | 0   | 0  | 53  | 0  | 0   | 6   | 233 |
|             | MGY | 0   | 0   | 0  | 0   | 0  | 12  | 20  | 78  |
|             | SHN | 0   | 0   | 0  | 4   | 0  | 32  | 0   | 126 |
|             | BEL | 0   | 0   | 1  | 51  | 0  | 35  | 0   | 243 |
|             | SGT | 0   | 0   | 0  | 14  | 0  | 38  | 4   | 196 |
|             | BRM | 0   | 0   | 0  | 18  | 0  | 15  | 0   | 123 |

|               |     |     |     |     |    |     |     |    |     |
|---------------|-----|-----|-----|-----|----|-----|-----|----|-----|
| <i>SREBF1</i> | ANG | 208 | 0   | 0   | 0  | 50  | 2   | 2  | 178 |
|               | HFD | 112 | 2   | 0   | 0  | 31  | 0   | 0  | 147 |
|               | MGY | 29  | 0   | 0   | 0  | 0   | 0   | 2  | 79  |
|               | SHN | 84  | 0   | 0   | 0  | 1   | 32  | 0  | 45  |
|               | BEL | 27  | 0   | 0   | 0  | 14  | 7   | 1  | 281 |
|               | SGT | 42  | 0   | 0   | 0  | 3   | 8   | 0  | 199 |
|               | BRM | 10  | 0   | 0   | 0  | 1   | 0   | 0  | 145 |
| <i>TCAP</i>   | ANG | 0   | 337 | 79  | 11 | 12  | 1   | 0  | 0   |
|               | HFD | 5   | 179 | 44  | 0  | 64  | 0   | 0  | 0   |
|               | MGY | 1   | 48  | 45  | 16 | 0   | 0   | 0  | 0   |
|               | SHN | 0   | 122 | 1   | 39 | 0   | 0   | 0  | 0   |
|               | BEL | 29  | 121 | 53  | 6  | 102 | 0   | 19 | 0   |
|               | SGT | 1   | 136 | 1   | 64 | 36  | 0   | 14 | 0   |
|               | BRM | 1   | 10  | 4   | 2  | 60  | 0   | 79 | 0   |
| <i>TG</i>     | ANG | 0   | 112 | 184 | 0  | 17  | 127 | 0  | 0   |
|               | HFD | 0   | 104 | 31  | 13 | 0   | 52  | 86 | 6   |
|               | MGY | 0   | 32  | 21  | 0  | 0   | 57  | 0  | 0   |
|               | SHN | 0   | 64  | 86  | 3  | 0   | 7   | 2  | 0   |
|               | BEL | 0   | 43  | 52  | 4  | 0   | 154 | 17 | 60  |
|               | SGT | 0   | 43  | 89  | 1  | 1   | 14  | 12 | 92  |
|               | BRM | 0   | 4   | 10  | 0  | 0   | 15  | 3  | 124 |

Note that for the gene *CXCR4*, this gene is the closest gene to the significant SNPs, but these are not located within the gene itself.
