# Supplementary material for: Haplotype Analysis Improved Evidence for Candidate Genes for Intramuscular Fat Percentage from a Genome Wide Association Study of Cattle
Source: PubMed Central journal article supplement (PMC3247274; doi:10.1371/journal.pone.0029601), 2011-12-28
Supplement: pone.0029601.s007.pdf [file pone.0029601.s007.pdf]

## Haplotype analysis improved evidence for candidate genes for intramuscular fat percentage from a genome wide association study of cattle

W. Barendse

### Supplementary Tables

**Table S7. Haplotype associations of candidate genes for IMF in the GWAS**

| Haplotype     | <i>b</i><br>(%) | s.e.  | <i>P</i> |
|---------------|-----------------|-------|----------|
| <b>ADIPOQ</b> |                 |       |          |
| h222          | -0.985          | 0.238 | 3.8e-05  |
| h122          | -0.879          | 0.224 | 9.2e-05  |
| <b>CXCR4</b>  |                 |       |          |
| h222          | -0.307          | 0.120 | 0.0105   |
| h221          | -0.518          | 0.148 | 5.0e-04  |
| h122          | -0.485          | 0.291 | 0.0960   |
| <i>or</i>     |                 |       |          |
| h212          | 0.337           | 0.119 | 0.0048   |
| <b>RORC</b>   |                 |       |          |
| h222          | 0.180           | 0.200 | 0.3677   |
| h221          | 0.064           | 0.207 | 0.7593   |
| h212          | 0.179           | 0.189 | 0.3415   |
| h122          | 0.035           | 0.209 | 0.8657   |
| <b>LEP</b>    |                 |       |          |
| h221          | 0.114           | 0.196 | 0.5616   |
| h212          | 0.168           | 0.175 | 0.3370   |
| h122          | 0.402           | 0.205 | 0.0506   |
| h112          | 0.220           | 0.168 | 0.1908   |
| <b>CAST</b>   |                 |       |          |
| h222          | -0.079          | 0.119 | 0.5073   |
| h212          | -0.100          | 0.097 | 0.2987   |
| h211          | 0.261           | 0.250 | 0.2960   |
| h122          | 0.110           | 0.122 | 0.3680   |
| h121          | 0.151           | 0.176 | 0.3885   |
| <b>CAPN3</b>  |                 |       |          |
| h222          | -0.154          | 0.362 | 0.6711   |
| h221          | 0.005           | 0.340 | 0.9874   |
| h211          | 0.106           | 0.342 | 0.7558   |
| h122          | -0.010          | 0.363 | 0.9774   |
| h121          | 0.065           | 0.341 | 0.8490   |
| <b>DGAT1</b>  |                 |       |          |
| h222          | -0.053          | 0.104 | 0.6077   |
| h122          | 0.280           | 1.050 | 0.7901   |
| <b>TG</b>     |                 |       |          |
| h222          | -0.128          | 0.270 | 0.6360   |
| h221          | -0.257          | 0.283 | 0.3635   |

|               |        |       |        |
|---------------|--------|-------|--------|
| h212          | -0.067 | 0.253 | 0.7902 |
| h121          | -0.061 | 0.252 | 0.8085 |
| h112          | -0.188 | 0.251 | 0.4537 |
| <b>CRH</b>    |        |       |        |
| h222          | 0.092  | 0.100 | 0.3610 |
| h221          | -0.018 | 0.130 | 0.8892 |
| h122          | 0.124  | 0.098 | 0.2053 |
| h121          | 0.085  | 0.166 | 0.6097 |
| <b>FABP4</b>  |        |       |        |
| h222          | -0.060 | 0.236 | 0.8001 |
| h221          | 0.008  | 0.236 | 0.9715 |
| h212          | -0.137 | 0.222 | 0.5382 |
| h211          | -0.018 | 0.252 | 0.9435 |
| h122          | -0.142 | 0.240 | 0.5550 |
| h121          | 0.029  | 0.262 | 0.9119 |
| <b>DECR1</b>  |        |       |        |
| h222          | 0.227  | 0.205 | 0.2690 |
| h221          | 0.078  | 0.195 | 0.6897 |
| h211          | 0.104  | 0.206 | 0.6123 |
| h112          | 0.066  | 0.193 | 0.7347 |
| h111          | 0.079  | 0.210 | 0.7083 |
| <b>CPE</b>    |        |       |        |
| h222          | 0.099  | 0.198 | 0.6157 |
| h212          | -0.141 | 0.172 | 0.4133 |
| h122          | -0.043 | 0.159 | 0.7871 |
| h112          | -0.151 | 0.152 | 0.3211 |
| h111          | -0.193 | 0.199 | 0.3341 |
| <b>CEBPA</b>  |        |       |        |
| h221          | 0.192  | 0.284 | 0.4997 |
| h212          | -0.292 | 0.097 | 0.0028 |
| h211          | -0.126 | 0.163 | 0.4413 |
| h122          | 0.026  | 0.212 | 0.9007 |
| h121          | -0.374 | 0.231 | 0.1054 |
| <i>or</i>     |        |       |        |
| h212          | -0.236 | 0.078 | 0.0027 |
| <b>SREBF1</b> |        |       |        |
| h222          | 0.354  | 0.205 | 0.0840 |
| h211          | 0.443  | 0.252 | 0.0786 |
| <b>TCAP</b>   |        |       |        |
| h221          | -0.168 | 0.283 | 0.5527 |
| h211          | -0.150 | 0.251 | 0.5515 |
| h122          | -0.455 | 0.270 | 0.0920 |
| h121          | 0.004  | 0.250 | 0.9866 |
| h112          | -0.148 | 0.241 | 0.5395 |
| <b>GHI</b>    |        |       |        |
| h222          | -0.109 | 0.303 | 0.7198 |
| h221          | -0.123 | 0.301 | 0.6840 |
| h211          | -0.188 | 0.325 | 0.5631 |

|              |        |       |        |
|--------------|--------|-------|--------|
| h122         | -0.103 | 0.310 | 0.7398 |
| h121         | -0.061 | 0.316 | 0.8476 |
| h112         | -0.237 | 0.301 | 0.4315 |
| h111         | 0.000  | 0.307 | 0.9994 |
| <b>FASN</b>  |        |       |        |
| h222         | 0.302  | 0.224 | 0.1781 |
| h221         | 0.224  | 0.205 | 0.2737 |
| h212         | 0.051  | 0.205 | 0.8018 |
| h121         | 0.338  | 0.264 | 0.2004 |
| h112         | 0.519  | 0.229 | 0.0238 |
| <i>or</i>    |        |       |        |
| h221         | -0.102 | 0.091 | 0.2623 |
| h212         | -0.287 | 0.100 | 0.0042 |
| <i>or</i>    |        |       |        |
| h212         | -0.239 | 0.090 | 0.0081 |
| <b>GHR</b>   |        |       |        |
| h212         | 0.481  | 0.373 | 0.1976 |
| h122         | 0.419  | 0.365 | 0.2517 |
| h112         | 0.607  | 0.388 | 0.1185 |
| h111         | 0.360  | 0.372 | 0.3333 |
| <b>SCD</b>   |        |       |        |
| h222         | -0.083 | 0.117 | 0.4776 |
| h212         | 0.204  | 0.142 | 0.1521 |
| h122         | -0.169 | 0.195 | 0.3843 |
| <b>FGF8</b>  |        |       |        |
| h211         | -0.405 | 0.439 | 0.3567 |
| h121         | -0.521 | 0.440 | 0.2361 |
| h112         | -0.428 | 0.452 | 0.3441 |
| h111         | -0.485 | 0.431 | 0.2602 |
| <b>CAPN1</b> |        |       |        |
| h222         | 0.168  | 0.232 | 0.4674 |
| h221         | 0.156  | 0.230 | 0.4985 |
| h122         | -0.102 | 0.208 | 0.6230 |
| h121         | 0.080  | 0.203 | 0.6936 |
| h112         | 0.186  | 0.210 | 0.3762 |
| <i>or</i>    |        |       |        |
| h222         | 0.003  | 0.135 | 0.9847 |
| h221         | -0.007 | 0.138 | 0.9564 |
| h122         | -0.263 | 0.102 | 0.0100 |
| h121         | -0.074 | 0.102 | 0.4684 |
| <b>IGF2</b>  |        |       |        |
| h222         | 0.042  | 0.133 | 0.7510 |
| h212         | -0.000 | 0.170 | 0.9982 |
| h122         | 0.126  | 0.135 | 0.3505 |

Note that for the gene *CXCR4*, this gene is the closest gene to the significant SNPs, but these are not located within the gene itself.
